# Supplementary material for: Selective chemical modification of soy protein for a tough and applicable plant protein-based material
Source: Royal Society of Chemistry journal article supplement (doi:10.1039/c5tb00523j), 2015-01-01
Supplement: c5tb00523j1.pdf [file c5tb00523j1.pdf]

## Supporting Information

### Selective Chemical Modification of Soy Protein for a Tough and Applicable Plant Protein-Based Material

Li Ma,<sup>a</sup> Yuhong Yang,<sup>b</sup> Jinrong Yao,<sup>\*a</sup> Zhengzhong Shao,<sup>a</sup> Yufang Huang,<sup>c</sup> Xin Chen<sup>\*a</sup>

<sup>a</sup>State Key Laboratory of Molecular Engineering of Polymers, Collaborative Innovation Center of Polymers and Polymer Composite Materials, Department of Macromolecular Science, Laboratory of Advanced Materials, Fudan University, Shanghai, 200433, People's Republic of China. E-mail: chenx@fudan.edu.cn, yaoyaojr@fudan.edu.cn

<sup>b</sup>Research Centre for Analysis and Measurement, Fudan University, Shanghai 200433, People's Republic of China

<sup>c</sup>Department of Materials Science, Fudan University, Shanghai 200433, People's Republic of China

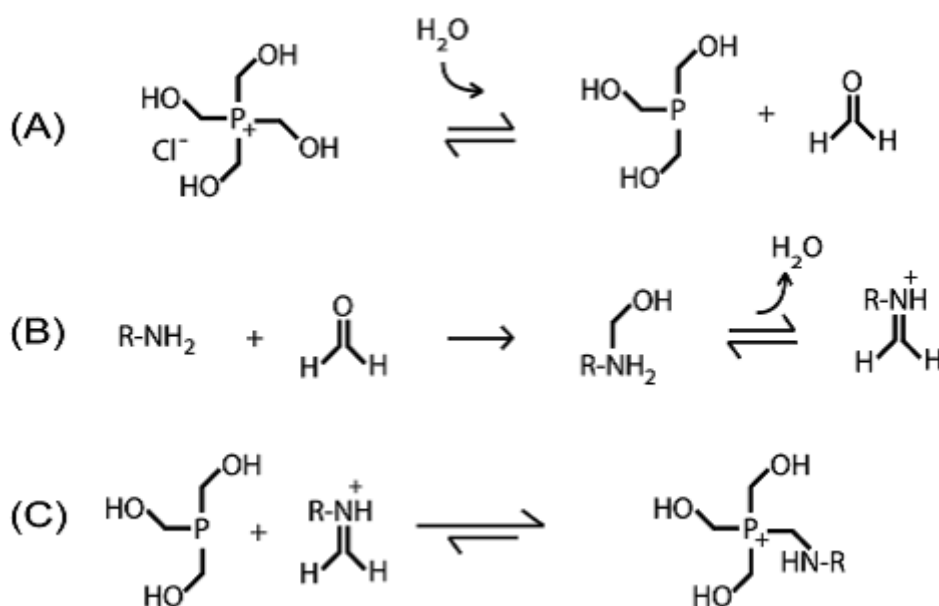

**Scheme S1** Suggested THPC reaction mechanism. (A) Formation of formaldehyde to initiate hydroxymethyl arm replacement, (B) amine-formaldehyde reaction to yield an ammonium ion in a Mannich-type reaction, and (C) phosphorus reaction with the ammonium ion to complete the amine coupling.<sup>1</sup>

**Table S1** Percentage of different count of unreacted hydroxymethyl arms in SPTCn samples (n=3)

| Sample | Three unreacted arms (%) | Two unreacted arms (%) | One unreacted arm (%) | Zero unreacted arm (%) |
|--------|--------------------------|------------------------|-----------------------|------------------------|
| SPTC1  | 72.1                     | 14.1                   | 1.3                   | 12.5                   |
| SPTC5  | 67.4                     | 20.3                   | 2.5                   | 9.8                    |
| SPTC10 | 78.2                     | 16.3                   | 2.3                   | 3.2                    |

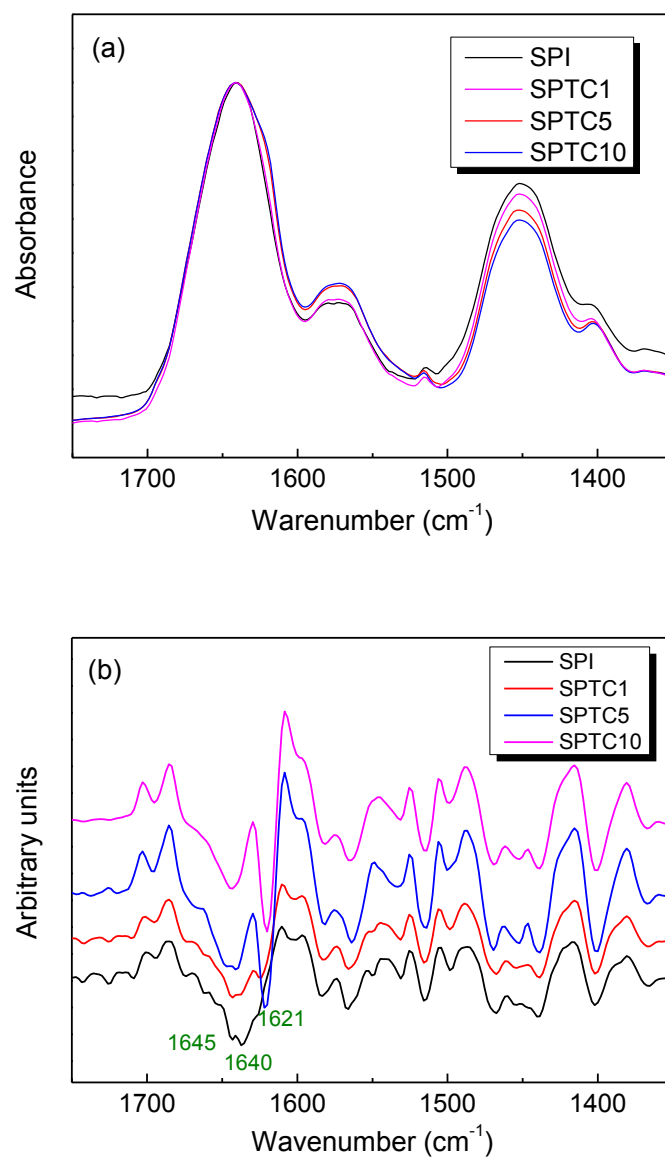

**Fig. S1** Original FTIR spectra (a) and the second derivative spectra (b) of SPI and SPTCn solutions.

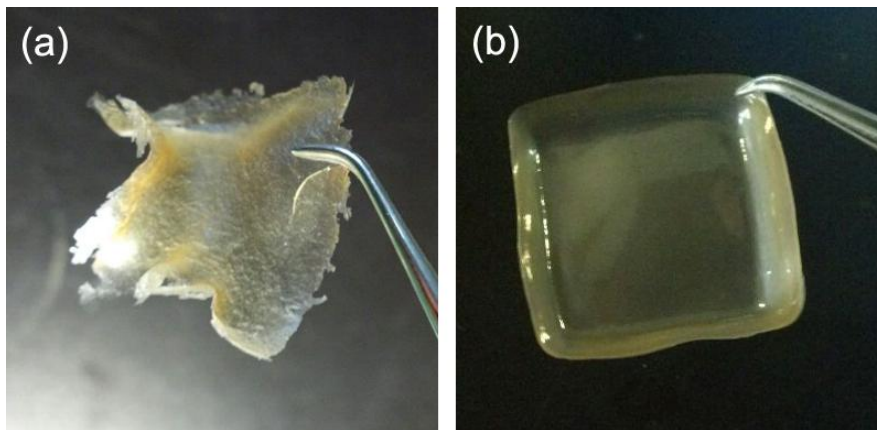

**Fig. S2** Photographs of SPTC10 film (a) and SPTC5 film (b) in dry state (50% relative humidity).

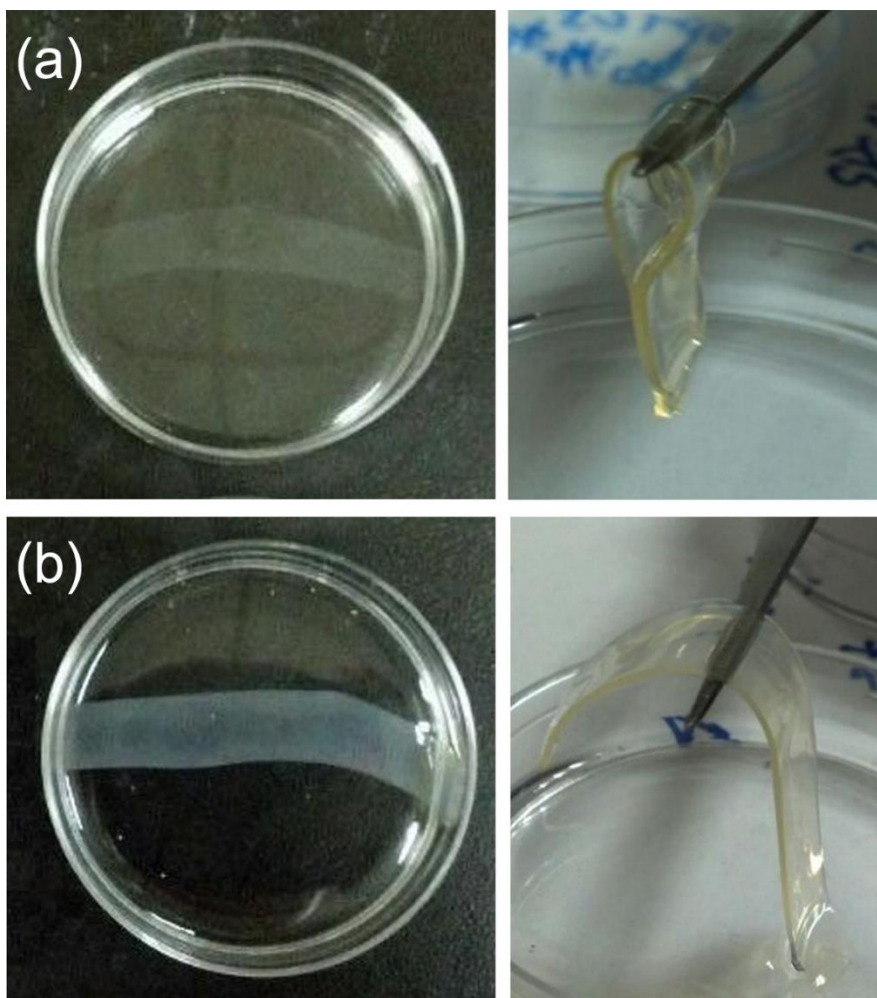

**Fig. S3** Photographs of SPTC5 film in guanidine hydrochloride and dithiothreitol mixture solution (a) and deionized water (b) for 5 days.
